# Supplementary material
Source: ML conference proceedings conference paper supplement (https://openreview.net/forum?id=dI4wzAE6uV)
Supplement: supplementary_material [file attachment]

## 584 A Datasheet for Datasets

585 We follow instructions provided by Datasheet for Datasets to answer the important ques-  
586 tions considering this dataset.

### 587 A.1 Motivation

588 **For what purpose was the dataset created?** The advancement of Large Language Models (LLMs)  
589 has raised concerns regarding whether state-of-the-art LLMs, such as ChatGPT and Codex, can replace  
590 human effort in real-world text-to-SQL tasks involving large database values. That is because their  
591 exceptional performance on previous academic tasks like SPIDER impresses researchers. However, we  
592 observe that current cross-domain text-to-SQL benchmarks only focus on the database schema, which  
593 lack of full attention on values, resulting in a gap between academic and real-world applications. To  
594 address this issue, we introduce BIRD, the largest cross-domain text-to-SQL benchmark highlighting  
595 extensive and realistic databases for community development. Additionally, we hope to observe  
596 the performance gap between LLMs and humans. Our experimental results indicate that, as of now,  
597 LLMs are still unable to replace human effort. As far as we know, BIRD is the first text-to-SQL  
598 benchmark to collect human performance.

599 **Who created the dataset (e.g., which team, research group) and on behalf of which entity (e.g.,**  
600 **company, institution, organization)?** Please refer to the author list for details. Our research team  
601 involves Star Lab at The University of Hong Kong, Alibaba DAMO Academy Conversational AI  
602 (ConAI) Team, the Department of Computer Science at the University of Illinois Urbana-Champaign,  
603 the Department of EECS at Massachusetts Institute of Technology, the School of Data Science at The  
604 Chinese University of Hong Kong (Shenzhen), and Database Group of Tsinghua University.

605 **Who funded the creation of the dataset?** This dataset is fully funded by the Alibaba DAMO  
606 Academy ConAI team. We spent 97,654 USD for presenting this data. The budget includes 10% for  
607 recruiting competent research interns, 80% for developing the benchmark, and 10% for refining and  
608 implementing the benchmark.

### 609 A.2 Composition

610 **What do the instances that comprise the dataset represent (e.g., documents, photos, people,**  
611 **countries)?** BIRD contains natural language questions, external knowledge evidence sentences,  
612 processed large databases, database description files (csv), and SQL queries.

613 **How many instances are there in total (of each type, if appropriate)?** BIRD contains 12,751  
614 natural language questions, 12,751 external knowledge evidence sentences, 95 processed large  
615 databases, 95 folders of database description CSV files, and 12,751 ground truth SQL queries.

616 **Does the dataset contain all possible instances or is it a sample (not necessarily random) of**  
617 **instances from a larger set?** In BIRD, we divide it into three sets: training, development, and  
618 testing. Training and development sets are public while testing data set is hidden for the fair evaluation  
619 of all text-to-SQL challengers. This could witness the real development of text-to-SQLs in the LLM  
620 era.

621 **Is there a label or target associated with each instance?** In BIRD, we provide two labels for each  
622 question instance: SQLs (the target of input) and external knowledge evidence (expert annotated  
623 evidence for each expected SQLs).

624 **Is any information missing from individual instances?** No.

625 **Are relationships between individual instances made explicit (e.g., users' movie ratings, social**  
626 **network links)?** No.

627 **Are there recommended data splits?** Our data consists of 9,428 instances for the training set,  
628 1,534 instances for the development set, and 1,789 instances for the concealed test set. The training  
629 and development sets are derived from public databases, while the test set databases are curated and  
630 designed by our specialized team. We do this because some researchers express concerns that the  
631 remarkable performance of LLMs in text-to-SQL tasks may not be attributed to an improvement in  
632 capabilities, but rather to the exposure of data and database values to the LLMs during the pre-training  
633 phase. To address these concerns, we opt to self-design new databases in testing using actual tabular  
634 data, thereby ensuring that LLMs do not preview the databases.

635 **Are there any errors, sources of noise, or redundancies in the dataset?** As stated in the main  
636 content, our double-blind annotation procedure is both expensive and rigorous, ensuring data quality.  
637 However, it is virtually impossible for any dataset, especially complex ones, to be entirely free  
638 of errors. Our team is committed to enhancing the data even after this paper is accepted, thereby  
639 contributing to the text-to-SQL community. In addition, we encourage users to provide feedback and  
640 report errors on our data website, allowing us to rectify and enhance the dataset.

641 **Is the dataset self-contained, or does it link to or otherwise rely on external resources (e.g.,  
642 websites, tweets, other datasets)?** Yes, all databases in training and development are collected  
643 under appropriate licenses. Please see Section 3.2 for more details

644 **Does the dataset contain data that might be considered confidential (e.g., data that is pro-  
645 tected by legal privilege or by doctor-patient confidentiality, data that includes the content of  
646 individuals' non-public communications)?** No.

647 **Does the dataset contain data that, if viewed directly, might be offensive, insulting, threatening,  
648 or might otherwise cause anxiety?** No.

649 **Does the dataset identify any subpopulations (e.g., by age, gender)?** Some questions mention  
650 ages and genders, but they are just used to detect the capability of models on text-to-SQLs. No bias  
651 or other opinions are involved.

652 **Is it possible to identify individuals (i.e., one or more natural persons), either directly or  
653 indirectly (i.e., in combination with other data) from the dataset?** No. All databases are  
654 collected from open-sourced platforms, and any sensitive data has already been processed before.

655 **Does the dataset contain data that might be considered sensitive in any way (e.g., data that  
656 reveals race or ethnic origins, sexual orientations, religious beliefs, political opinions or union  
657 memberships, or locations; financial or health data; biometric or genetic data; forms of  
658 government identification, such as social security numbers; criminal history)?** No, this is a  
659 QA-based text-to-SQL dataset, we don't require models to deliver any opinions on results. And also  
660 we don't present any bias or opinions in the dataset.

### 661 A.3 Collection Process

662 **How was the data associated with each instance acquired?** Section 3 and Appendix B.2 introduce  
663 this in detail.

664 **What mechanisms or procedures were used to collect the data (e.g., hardware apparatuses or  
665 sensors, manual human curation, software programs, software APIs)?** Section 3 and Appendix  
666 B.2 introduce this in detail. Our crowdworkers use Alibaba internal labeling software to annotate the  
667 data and examine the results.

668 **If the dataset is a sample from a larger set, what was the sampling strategy (e.g., deterministic,  
669 probabilistic with specific sampling probabilities)?** No.

670 **Who was involved in the data collection process (e.g., students, crowdworkers, contractors) and**  
671 **how were they compensated (e.g., how much were crowdworkers paid)?** Four PhD students  
672 and two MS students are involved in the creation of database description files. Two independent  
673 teams of crowdworkers are recruited to annotate questions, and SQLs. The question annotators are  
674 composed of 11 English native speakers and SQL annotators are comprised of database engineers  
675 and DB students. The total consumption is 97,654 USD.

676 **Over what timeframe was the data collected?** From Sep. 2022 to Mar. 2023.

677 **Were any ethical review processes conducted (e.g., by an institutional review board)?** Yes, we  
678 take such issues very seriously. During the review process, we found that certain questions related to  
679 politics or inappropriate language. We have addressed these concerns by modifying the content and  
680 providing a serious warning to the annotators responsible for such instances.

681 **Did you collect the data from the individuals in question directly, or obtain it via third parties**  
682 **or other sources (e.g., websites)?** Section 3 and Appendix B.2 introduce this in detail.

683 **Were the individuals in question notified about the data collection?** Yes.

684 **Did the individuals in question consent to the collection and use of their data?** Sure, we  
685 recruited them and paid the satisfying salaries.

686 **If consent was obtained, were the consenting individuals provided with a mechanism to revoke**  
687 **their consent in the future or for certain uses?** No.

688 **Has an analysis of the potential impact of the dataset and its use on data subjects (e.g., a**  
689 **data protection impact analysis) been conducted?** Yes, we did a very comprehensive analysis  
690 including error analysis, and efficiency analysis, in the experiments of the paper and Appendix.

#### 691 **A.4 Preprocessing/cleaning/labeling**

692 **Was any preprocessing/cleaning/labeling of the data done (e.g., discretization or bucketing,**  
693 **tokenization, part-of-speech tagging, SIFT feature extraction, removal of instances, processing**  
694 **of missing values)?** Yes, we provide token list for each question and SQLs from NLTK for users.

695 **Was the “raw” data saved in addition to the preprocessed/cleaned/labeled data (e.g., to support**  
696 **unanticipated future uses)?** No. Is the software that was used to preprocess/clean/label the data  
697 available? Yes, <https://www.nltk.org/>

#### 698 **A.5 Uses**

699 **Has the dataset been used for any tasks already?** No.

700 **Is there a repository that links to any or all papers or systems that use the dataset?** No.

701 **What (other) tasks could the dataset be used for?** Sure, our databases and analysis-style questions  
702 are most valuable, so they could be beneficial to DB-based code generation, data science analysis,  
703 etc.

704 **Is there anything about the composition of the dataset or the way it was collected and prepro-**  
705 **cessed/cleaned/labeled that might impact future uses?** No.

706 **Are there tasks for which the dataset should not be used?** No.

707 **A.6 Distribution**

708 **Will the dataset be distributed to third parties outside of the entity (e.g., company, institution,**  
709 **organization) on behalf of which the dataset was created?** No.

710 **How will the dataset will be distributed (e.g., tarball on the website, API, GitHub)?** All  
711 source codings, and datasets could be found on our leaderboard website: [https://bird-bench.](https://bird-bench.github.io/)  
712 [github.io/](https://bird-bench.github.io/). And we provide fast download links for the convenience of researchers who want  
713 to use our big data. Furthermore, the code repository can be found in [https://github.com/](https://github.com/AlibabaResearch/DAMO-ConvAI/tree/main/bird)  
714 [AlibabaResearch/DAMO-ConvAI/tree/main/bird](https://github.com/AlibabaResearch/DAMO-ConvAI/tree/main/bird)

715 **When will the dataset be distributed?** Now.

716 **Will the dataset be distributed under a copyright or other intellectual property (IP) license,**  
717 **and/or under applicable terms of use (ToU)?** Given the database size of BIRD is the largest until  
718 now, we are afraid that abusing ample database values may lead to inappropriate commercial use.  
719 Therefore, we claim that this dataset should be distributed under CC BY-NC 4.0.

720 **Have any third parties imposed IP-based or other restrictions on the data associated with the**  
721 **instances?** No.

722 **Do any export controls or other regulatory restrictions apply to the dataset or to individual**  
723 **instances?** No.

724 **A.7 Maintenance**

725 **Who will be supporting/hosting/maintaining the dataset?** HKU STAR LAB and Alibaba DAMO  
726 Academy

727 **How can the owner/curator/manager of the dataset be contacted (e.g., email address)?** Contact  
728 [bird.bench23@gmail.com](mailto:bird.bench23@gmail.com) or the corresponding authors or co-first authors in the author list.

729 **Is there an erratum?** No.

730 **Will the dataset be updated (e.g., to correct labeling errors, add new instances, delete instances)?**  
731 Yes, we will keep polishing and optimizing our data periodically.

732 **If the dataset relates to people, are there applicable limits on the retention of the data associated**  
733 **with the instances (e.g., was the individuals in question were told that their data would be**  
734 **retained for a fixed period of time and then deleted)?** No.

735 **Will older versions of the dataset continue to be supported/hosted/maintained?** No. The most  
736 updated version will be more reliable.

737 **If others want to extend/augment/build on/contribute to the dataset, is there a mechanism for**  
738 **them to do so?** Yes, but they should contact the authors first.



## B Appendix

### B.1 Text-to-SQL Difficulty

In order to help researchers deeply analyze model performance in various text-to-SQL case levels, we class all examples as `simple` (30%), `moderate` (60%), and `challenging` (10%). Previous work, such as SPIDER, computed difficulty mainly based on SQL complexity. However, we find that additional factors, such as question comprehension, schema linking, and external knowledge reasoning, also influence model and human performance. Therefore, each SQL annotator is required to evaluate examples based on these factors, and experts conclude the ratings to divide examples into the three aforementioned difficulty levels. This approach offers a more extensive difficulty analysis for text-to-SQL tasks. And the performance of ChatGPT on three different difficulty levels is shown in Table B.1.

| MODEL              | DEV SET      |              |              |              | TEST SET     |              |              |              |
|--------------------|--------------|--------------|--------------|--------------|--------------|--------------|--------------|--------------|
|                    | simple       | moderate     | challenging  | total        | simple       | moderate     | challenging  | total        |
| (EX) ChatGPT       | 31.08        | 13.29        | 12.08        | 24.05        | 35.41        | 19.46        | 12.28        | 26.77        |
| (EX) ChatGPT + KG  | <b>45.44</b> | <b>26.14</b> | <b>19.01</b> | <b>37.22</b> | <b>49.21</b> | <b>31.89</b> | <b>20.70</b> | <b>39.30</b> |
| (VES) ChatGPT      | 36.20        | 15.43        | 14.42        | 27.97        | 50.09        | 24.71        | 15.39        | 36.68        |
| (VES) ChatGPT + KG | <b>54.71</b> | <b>28.16</b> | <b>22.80</b> | <b>43.81</b> | <b>65.06</b> | <b>41.21</b> | <b>25.81</b> | <b>51.40</b> |

Table 4: The Execution Accuracy (EX) and Valid Efficiency Score (VES) are presented for both the ChatGPT model and its version with grounding (KG) for external knowledge evidence, taking into consideration development and testing datasets.

### B.2 Annotation Entrance

**Question Annotation Entrance.** We hire a group of native speakers of English with degrees above the bachelor’s level and database-related knowledge to ask a variety of natural language questions regarding the values of databases. To fulfill this objective, we have adopted the following procedure: (1). ER diagrams and database description files are documented to assist the annotators in understanding the databases; (2). we present the annotators with three databases from different domains and require them to generate 10 questions for each database; (3). these questions are then assessed by 3 text-to-SQL experts applying predefined rules. Those questions earning at least two votes are marked as valid. Only annotators capable of generating more than 8 valid questions per database are preserved. As a result, 11 native speakers contribute questions to BIRD.

**SQL Annotation Entrance.** With the purpose of enhancing the quality of our SQL queries, we assemble a team of skilled data engineers and database students. The team undergoes rigorous testing through the text-to-SQL evaluation process, which assesses their capability of generating SQL queries for a variety of questions facing different domains of databases. Each annotator is asked to answer 10 questions, and only those who score at least 9 out of 10 will be qualified to annotate SQL queries for BIRD.

### B.3 Question Distribution

Figure 6 contains the detailed question types and their examples.

### B.4 Experiment Details

**FT-based Models.** T5 is a strong and versatile pre-trained language model (PLM) for the text-to-text generation that has achieved state-of-the-art performance in a variety of semantic parsing tasks, including text-to-SQL. We concatenate the question with serialized database schema as input [38, 48, 39]. And SQL can be fetched in an end-to-end fashion by easily fine-tuning. While seq2AST-based methods [41, 3] are also effective in text-to-SQL, actually their grammar rules utilized during decoding are constrained on specific datasets [24]. We implement our codes mainly based on the

| Question Type    | Sub Type            | Question / SQL                                                                                                                                                                                                                                                                                                                                                                                               | Percentage |
|------------------|---------------------|--------------------------------------------------------------------------------------------------------------------------------------------------------------------------------------------------------------------------------------------------------------------------------------------------------------------------------------------------------------------------------------------------------------|------------|
| Fundamental Type | Match-based         | How many gas stations in <b>CZE</b> has <b>Premium</b> gas?<br><br>SELECT COUNT(GasStationID) FROM gasstations<br>WHERE Country = ' <b>CZE</b> ' AND Segment = ' <b>Premium</b> '                                                                                                                                                                                                                            | 83.9 %     |
|                  | Ranking             | What are the titles of the <b>top 5</b> posts with the highest popularity?<br><br>SELECT Title FROM posts ORDER BY ViewCount DESC<br><b>LIMIT 5</b>                                                                                                                                                                                                                                                          | 20.3 %     |
|                  | Comparison          | How many color cards with no borders have been ranked <b>higher than 12000</b> on EDHRec?<br><br>SELECT COUNT(id) FROM cards WHERE edhrecRank > <b>12000</b> AND borderColor = 'borderless'                                                                                                                                                                                                                  | 16.7 %     |
|                  | Counting            | <b>How many</b> of the members' hometowns are from Maryland state?<br><br>SELECT COUNT( <b>T2.member_id</b> ) FROM zip_code AS T1<br>INNER JOIN member AS T2 ON T1.zip_code = T2.zip<br>WHERE T1.state = 'Maryland'                                                                                                                                                                                          | 30.4 %     |
|                  | Aggregation         | What is the <b>average height</b> of the superheroes from Marvel Comics?<br><br>SELECT AVG( <b>T1.height_cm</b> ) FROM superhero AS T1<br>INNER JOIN publisher AS T2 ON T1.publisher_id = T2.id WHERE T2.publisher_name = 'Marvel Comics'                                                                                                                                                                    | 15.7 %     |
| Reasoning Type   | Domain Knowledge    | Name the ID and age of patient with two or more laboratory examinations which show their <b>hematocrit level exceeded the normal range</b> .<br><br>SELECT T1.ID, STRFTIME('%Y', CURRENT_TIMESTAMP) - STRFTIME('%Y', T1.Birthday) FROM Patient AS T1<br>INNER JOIN Laboratory AS T2 ON T1.ID = T2.ID WHERE T1.ID IN ( SELECT ID FROM Laboratory WHERE <b>HCT &gt; 52</b> GROUP BY ID HAVING COUNT(ID) >= 2 ) | 23.6 %     |
|                  | Numeric Computation | Among the posts with a score of over 20, what is the <b>percentage</b> of them being owned by an elder user?<br><br>SELECT CAST(SUM(IIF(T2.Age > 65, 1, 0)) AS REAL) * 100 / count(T1.Id) FROM posts AS T1<br>INNER JOIN users AS T2 ON T1.OwnerUserId = T2.Id<br>WHERE T1.Score > 20                                                                                                                        | 24.5 %     |
|                  | Synonym             | How many clients opened their accounts in Jesenik branch were <b>women ? (female)</b><br><br>SELECT COUNT(T1.client_id) FROM client AS T1<br>INNER JOIN district AS T2 ON T1.district_id = T2.district_id WHERE <b>T1.gender = 'F'</b> AND T2.A2 = 'Jesenik'                                                                                                                                                 | 7.2 %      |
|                  | Value Illustration  | Among the <b>weekly issuance</b> accounts, how many have a loan of under 200000?<br><br>SELECT COUNT(T1.account_id) FROM loan AS T1<br>INNER JOIN account AS T2 ON T1.account_id = T2.account_id WHERE <b>T2.frequency = 'POPLATEK TYDNE'</b> AND T1.amount < 200000                                                                                                                                         | 70.1 %     |

Figure 6: Questions in the BIRD contain two main categories. The Fundamental Type of questions are comparable to other text-to-SQL benchmarks. The Reasoning Type of questions requires external knowledge grounding to answer.

775 hugging-face transformers library \*\*. We set the max input length as 1024, the generation max length  
776 as 512, and the batch size as 32. We also adopt Adafactor as our primary optimizer with a linear  
777 decayed learning rate of 5e-5. All experiments are conducted on one NVIDIA Tesla A100 80GB,  
778 which is available for most research centers. We set the random seed as 1 for all runs of FT-based  
779 models since 1 is an optimal seed proven by previous SOTA models [26, 48].

\*\*<https://huggingface.co/>

**ICL-based Models.** Codex (code-davinci-002<sup>††</sup>) and ChatGPT (gpt-3.5-turbo) are popular and powerful large-scale pre-trained language models (LLMs) for code generation driven by ICL. It can produce multiple types of codes, including SQL, from human instructions without additional training. We employ programming-based prompts, as described in [37], to collect results by calling the API. Also, we choose Azure OpenAI API to align the codes with other variants of LLMs. Given that models are not allowed to unseen databases and ground-truth SQLs in the evaluation set, a zero-shot generation strategy is the most appropriate. Moreover, to investigate the impact of multi-step reasoning of LLMs on BIRD, we implement the Chain-Of-Thought (COT) technique [47] by easily adding the prompt sentence "Let's think step by step." before the generation of SQLs [20]. However, we find out the output of ChatGPT is too uncertain with many unexpected explanations, thus we provide a 1-shot pseudo example for ChatGPT to learn the procedure of thinking and output format. The detailed prompt design is shown in Figure 7. In order to minimize the randomness of results, we set the temperature as 0 to ensure reproduction.

**Knowledge Fusion.** In the baseline implementation, we naively concatenate the knowledge evidence sentences with questions and database schemas, but we can observe a significant improvement by this easy method. A more complicated and effective strategy of knowledge grounding for ChatGPT and T5 would be an important future topic. The knowledge evidence sentences are concluded to the external knowledge provided by annotators as described in Section 3.3.

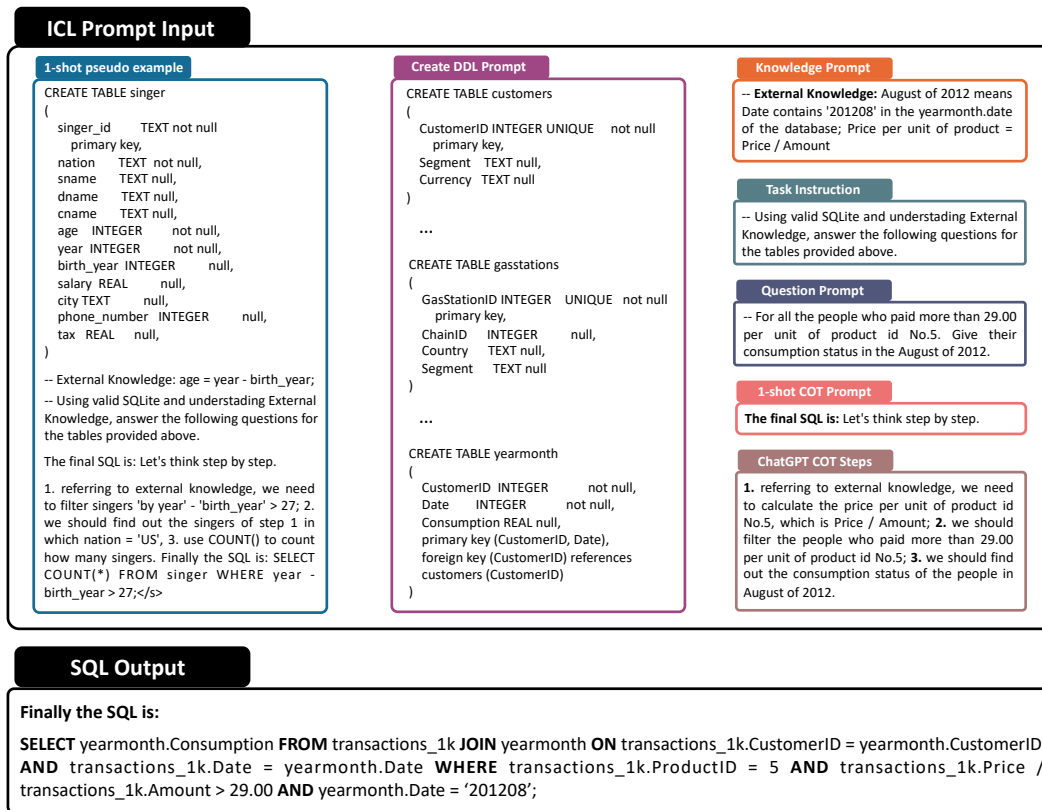

Figure 7: The detailed prompt design for implementation of ChatGPT + KG + COT.

<sup>††</sup><https://openai.com/blog/openai-api>

<sup>‡‡</sup>It's still valid at the time of writing.

799 Two strategies for performing text-to-efficient-SQL are presented in Figure 8. Examples show that  
800 both two-stage optimization and embodied databases can help semantic parsings generate more efficient SQLs.

| Query Rewriting                                                                                                                                                                                                                                                                                                                                                                                                                                                                                                                                                                                                                                                                                                                                                                                                          |
|--------------------------------------------------------------------------------------------------------------------------------------------------------------------------------------------------------------------------------------------------------------------------------------------------------------------------------------------------------------------------------------------------------------------------------------------------------------------------------------------------------------------------------------------------------------------------------------------------------------------------------------------------------------------------------------------------------------------------------------------------------------------------------------------------------------------------|
| <p><b>Ex1.1 Question:</b><br/>List out the age of users who located in Vienna, Austria obtained the badge?</p> <p><b>ChatGPT SQL:</b><br/>SELECT Age FROM users WHERE Location = 'Vienna, Austria' AND Id IN (SELECT UserId FROM badges)</p> <p><b>Optimized SQL:</b> (time-saving percentage: 99.92%)<br/>SELECT u.Age FROM users AS u INNER JOIN badges AS b ON u.Id = b.UserId WHERE u.Location = 'Vienna, Austria'</p> <p><b>Take Away:</b><br/>By applying a JOIN operation instead of a subquery with IN can improve efficiency, as the database may execute the JOIN and filtering processes concurrently in just one operation <b>without</b> the need to store the intermediate results to filter primary query.</p>                                                                                            |
| <p><b>Ex1.2 Question:</b><br/>How many of the members' hometowns are from Maryland state?</p> <p><b>ChatGPT SQL:</b><br/>SELECT COUNT(*) FROM member INNER JOIN zip_code ON member.zip = zip_code.zip_code WHERE zip_code.state = 'Maryland'</p> <p><b>Optimized SQL:</b> (time-saving percentage: 67.93%)<br/>SELECT COUNT(member.member_id) FROM member INNER JOIN zip_code ON member.zip = zip_code.zip_code WHERE zip_code.state = 'Maryland'</p> <p><b>Take Away:</b><br/>Utilizing the COUNT function on a NOT-NULL column, as opposed to COUNT(*), can increase time efficiency. This rewritten SQL enables the database to count NOT-NULL values within a single column, rather than compute all rows including those with NULL values. Usually, the primary key column is selected as this NOT-NULL column.</p> |
| <p><b>Ex1.3 Question:</b><br/>Who is the owner of the account with the largest loan amount?</p> <p><b>ChatGPT SQL:</b><br/>SELECT c.client_id FROM client c INNER JOIN disp d ON c.client_id = d.client_id INNER JOIN loan l ON d.account_id = l.account_id ORDER BY l.amount DESC LIMIT 1</p> <p><b>Optimized SQL:</b> (time-saving percentage: 62.39%)<br/>SELECT c.client_id FROM client c INNER JOIN disp d ON c.client_id = d.client_id INNER JOIN loan l ON d.account_id = l.account_id WHERE l.amount = ( SELECT MAX(amount) FROM loan)</p> <p><b>Take Away:</b><br/>In an unindexed environment, employing the MAX function can potentially yield faster results since it avoids the need for <b>sorting</b>, which could run against a large table.</p>                                                         |
| Adding Indexes to Database                                                                                                                                                                                                                                                                                                                                                                                                                                                                                                                                                                                                                                                                                                                                                                                               |
| <p><b>Ex2.1 Question:</b><br/>How many accounts are there in the district of 'Pisek'?</p> <p><b>ChatGPT SQL:</b><br/>SELECT COUNT(*) FROM account a INNER JOIN district d ON a.district_id = d.district_id WHERE d.A2 = 'Pisek'</p> <p><b>Added Indexes:</b> (time-saving percentage: 87.27%)<br/>CREATE INDEX account_district_id_index ON account(district_id);<br/>CREATE UNIQUE INDEX district_district_id_uindex ON district(district_id);</p> <p><b>Take Away:</b><br/>Adding <b>indexes</b> into a database can significantly increase the speed of SQL queries because it creates a data structure that enables the database engine to quickly locate rows that match specific criteria instead of <b>scanning</b> the entire table.</p>                                                                         |

Figure 8: Two possible solutions and explanations to improve efficiency are presented. The first batch of examples shows how to optimize SQL efficiency by rewriting SQL based on rules. The last example is to show that adding indexes to databases can also improve SQL efficiency without rewriting them.

Figure 9 presents a detailed analysis of errors made by ChatGPT.

| Wrong Schema Linking (41.6%)                                                                                                                                                                                                                                                                                                                                                                                                                                                                                                                                                                                                                                                                                                    |                                                                                                                                                                                                                                                                                                                                                                                                                                                                                                                                                                   | Misunderstanding Knowledge Evidence (17.6%)                                                                                                                                                                                                                                                                                                                                                                                                                                                                             |                                                                                                                                                                                                                                                                                                                                                                                                                                                                                                                                                                                                                 |
|---------------------------------------------------------------------------------------------------------------------------------------------------------------------------------------------------------------------------------------------------------------------------------------------------------------------------------------------------------------------------------------------------------------------------------------------------------------------------------------------------------------------------------------------------------------------------------------------------------------------------------------------------------------------------------------------------------------------------------|-------------------------------------------------------------------------------------------------------------------------------------------------------------------------------------------------------------------------------------------------------------------------------------------------------------------------------------------------------------------------------------------------------------------------------------------------------------------------------------------------------------------------------------------------------------------|-------------------------------------------------------------------------------------------------------------------------------------------------------------------------------------------------------------------------------------------------------------------------------------------------------------------------------------------------------------------------------------------------------------------------------------------------------------------------------------------------------------------------|-----------------------------------------------------------------------------------------------------------------------------------------------------------------------------------------------------------------------------------------------------------------------------------------------------------------------------------------------------------------------------------------------------------------------------------------------------------------------------------------------------------------------------------------------------------------------------------------------------------------|
| <b>Question:</b><br>List the <b>names of schools</b> with more than 30 differences in enrollments between K-12 and ages 5-17. Please also give the <b>full street address</b> of the schools.<br><b>Evidence:</b><br>Difference in enrollment = 'Enrollment (K-12)' - Enrollment (Ages 5-17)<br><b>Ground Truth:</b><br>SELECT T1.School, T1.StreetAddr FROM schools AS T1 INNER JOIN frpm AS T2 ON T1.CDSCode = T2.CDSCode WHERE T2.Enrollment (K-12) - T2.Enrollment (Ages 5-17) > 30<br><b>ChatGPT SQL:</b><br>SELECT s.School, s.Street, s.City, s.Zip FROM schools s JOIN frpm f ON s.CDSCode = f.CDSCode WHERE f.Enrollment (K-12) - f.Enrollment (Ages 5-17) > 30                                                        | <b>Question:</b><br>List out the accounts who have the earliest <b>trading date</b> in 1995.<br><b>Evidence:</b><br>False<br><b>Ground Truth:</b><br>SELECT account_id FROM trans WHERE STRFTIME('%Y', date) = '1995' ORDER BY date ASC LIMIT 1<br><b>ChatGPT SQL:</b><br>SELECT account_id FROM account WHERE date = (SELECT MIN(date) FROM account WHERE date LIKE '1995%')                                                                                                                                                                                     | <b>Question:</b><br>On <b>average</b> , how much did the Student Club spend on food for the typical event in the past?<br><b>Evidence:</b><br>DIVIDE(SUM(spent), COUNT(spent)) where category = 'Food'; 'event in the past' means event_status = 'Closed'<br><b>Ground Truth:</b><br>SELECT SUM(spent) / COUNT(spent) FROM budget WHERE category = 'Food' AND event_status = 'Closed'<br><b>ChatGPT SQL:</b><br>SELECT DIVIDE(SUM(spent), COUNT(spent)) FROM budget WHERE category = 'Food' AND event_status = 'Closed' | <b>Question:</b><br>Name elementary schools in Riverside which the <b>average of average math score</b> for SAT is greater than 400, what is the finding type of these schools?<br><b>Evidence:</b><br>Average of average math = sum(average math scores) / count(schools)<br><b>Ground Truth:</b><br>SELECT T1.sname, T2.'Charter Funding Type' FROM satscores AS T1 INNER JOIN frpm ... HAVING CAST(SUM(T1.AvgScrMath) AS REAL) / COUNT(T1.cds) > 400<br><b>ChatGPT SQL:</b><br>SELECT s.School, s.FundingType FROM schools s ... AND sc.rtype = 'E' AND sc.AvgScrMath > 400 GROUP BY s.School, s.FundingType |
| Misunderstanding Database Content (40.8%)                                                                                                                                                                                                                                                                                                                                                                                                                                                                                                                                                                                                                                                                                       |                                                                                                                                                                                                                                                                                                                                                                                                                                                                                                                                                                   | Syntax Error (3.0%)                                                                                                                                                                                                                                                                                                                                                                                                                                                                                                     |                                                                                                                                                                                                                                                                                                                                                                                                                                                                                                                                                                                                                 |
| <b>Question:</b><br>What is the <b>average math score</b> of the school with the <b>lowest average score</b> for all subjects, and in which county is it located?<br><b>Evidence:</b><br>Average score for all subjects can be computed by AvgScrMath + AvgScrRead + AvgScrWrite<br><b>Ground Truth:</b><br>SELECT T1.AvgScrMath, T2.County FROM satscores AS T1 INNER JOIN schools AS T2 ON T1.cds = T2.CDSCode WHERE T1.AvgScrMath IS NOT NULL ORDER BY T1.AvgScrMath + T1.AvgScrRead + T1.AvgScrWrite ASC LIMIT 1<br><b>ChatGPT SQL:</b><br>SELECT cname, AvgScrMath FROM satscores JOIN schools ON satscores.cds = schools.CDSCode WHERE satscores.rtype = 'S' ORDER BY (AvgScrMath + AvgScrRead + AvgScrWrite) ASC LIMIT 1 | <b>Question:</b><br>What is the <b>average lap time</b> in milliseconds of all the lap records set on the various circuits in Italy?<br><b>Evidence:</b><br>average = AVG(milliseconds)<br><b>Ground Truth:</b><br>SELECT CAST(SUM(T1.milliseconds) AS REAL) / COUNT(T1.lap) FROM lapTimes AS T1 INNER JOIN races AS T2 ON T1.raceId = T2.raceId INNER JOIN circuits AS T3 ON T2.circuitId = T3.circuitId WHERE T3.country = 'Italy'<br><b>ChatGPT SQL:</b><br>SELECT AVG(milliseconds) FROM lap_records WHERE circuit IN ('Monza', 'Imola', 'Mugello', 'Misano') | <b>Question:</b><br>How many meeting events were held in <b>2020</b> ?<br><b>Evidence:</b><br>meeting events refers to type = 'Meeting'; held in 2020 refers to YEAR(event_date) = 2020<br><b>Ground Truth:</b><br>SELECT COUNT(event_id) FROM event WHERE type = 'Meeting' AND STRFTIME('%Y', column) = '2020'<br><b>ChatGPT SQL:</b><br>SELECT COUNT(*) FROM event WHERE type = 'Meeting' AND YEAR(event_date) = 2020                                                                                                 | <b>Question:</b><br>How much more was customer 7 consuming in April 2013 than customer 5?<br><b>Evidence:</b><br>April 2013 refers to '201304' in the yearmonth.date<br><b>Ground Truth:</b><br>SELECT SUM(IIF(CustomerID = 7, Consumption, 0)) - SUM(IIF(CustomerID = 5, Consumption, 0)) FROM yearmonth WHERE Date = '201304'<br><b>ChatGPT SQL:</b><br>SELECT7, (SELECT Consumption FROM yearmonth WHERE CustomerID = 7 AND Date = '201304') - (SELECT Consumption FROM yearmonth WHERE CustomerID = 5 AND Date = '201304')                                                                                  |

Figure 9: 4 major types of error cases are presented. Some cases are shortcuts for better presentation.

803

## 804 B.7 Evaluation Details

805 During double-blind annotation in BIRD, we encountered numerous ambiguous issues that led  
 806 to mismatches, predominantly due to unclear user intents. The most serious ambiguity is the  
 807 use of "DISTINCT". Some annotators believe it should present only unique values, such as  
 808 names, and cities, while others argue that it should be used only when questions explicitly mention  
 809 "different" or "distinctive". Therefore, we use HashSet rather than List to compare final  
 810 results since HashSet disregards row order and automatically filters repetitive rows to reduce this am-  
 811 biguity. However, this may result in false positives for questions utilizing "ORDER BY." We identify  
 812 three "ORDER BY" usage scenarios in BIRD: **1) Rank-based questions** (e.g., "Show me the  
 813 top 5 students according to their math scores"): The order is less important  
 814 as long as the results contain the correct students. **2) Superlative questions:** (e.g., "List the  
 815 longest river in the USA"): The answer typically contains only one item (or tied results),  
 816 so the impact is minimal. **3) Questions requiring a specific order** (e.g., "Show me the top  
 817 five students based on their math scores in descending order"): This  
 818 scenario explicitly requires correct ordering and may lead to false positives. However, such in-  
 819 stances are uncommon, accounting for less than 1% of BIRD.

## 820 B.8 Human Performance Collection

821 The procedure of collecting human performance is still rigorous. During the annotation, all data is  
 822 divided into 10 batches for better management and error tracks by experts. The first 8 batches of  
 823 data is the final training data and dev data for public use, and the remaining 2 batches of data are  
 824 used for testing. We consider the annotation of the first 8 batches of data as a learning process for  
 825 SQL annotators since their erroneous SQLs could be fixed by experts and learn how to generate  
 826 good-quality SQLs for this task. Then their first scores on an examination, conducted by testing  
 827 set from the final two batches can be viewed as human performance since we don't interrupt and  
 828 assist them during the examination and all errors are preserved. After testing, we proceed with the  
 829 following double-blind SQL annotation procedures as Section 3.4 to correct SQLs for these data by a

830 discussion with experts. And SQLs after the second round of double-blind annotation are collected as  
831 ground truth.

## 832 **B.9 Distribution of Open-source Databases**

833 The databases in BIRD are all in accordance with one of following licenses:

### 834 **Public Domain** Public Domain Mark

835 A public domain license refers to a legal designation that allows intellectual property, such as creative  
836 works or inventions, to be freely used, shared, and built upon by anyone without restrictions. When a  
837 work is in the public domain, it is no longer protected by copyright, patent, or trademark laws.

### 838 **CC-BY** Creative Commons Attribution 4.0 International

839 This license is one of the open Creative Commons licenses and allows users to share and adapt the  
840 dataset so long as they give credit to the creator.

### 841 **CC-BY-SA** Creative Commons Attribution-ShareAlike 4.0 International

842 This license is one of the open Creative Commons licenses and allows users to share and adapt the  
843 dataset so long as they give credit to the creator and distribute any additions, transformations, or  
844 changes to the dataset under this license.

### 845 **GPL** General Public License

846 The GPL was created by the Free Software Foundation (FSF) and is also known as the GNU GPL, as  
847 it is used by the GNU Project. And it allows users to use, study, share, and modify the software under  
848 certain terms and conditions.

### 849 **CPOL** Code Project Open License

850 It is a software license that is often used for articles, tutorials, and sample code shared on The Code  
851 Project website. The CPOL is intended to be a more permissive license, allowing developers to use,  
852 modify, and distribute the software without many of the restrictions imposed by other licenses like  
853 the GPL.

### 854 **CC0** Creative Commons Zero

855 It is a public domain dedication tool created by Creative Commons. It allows creators to waive all  
856 their copyright and related rights in a work, effectively placing it in the public domain. This means  
857 that anyone can freely use, share, modify, and build upon the work without seeking permission or  
858 providing attribution to the original creator.

## 859 **B.10 Keyword Statistic**

860 We have conducted a comprehensive analysis of the keywords employed in the BIRD dataset and  
861 visualize the results in the form of a nice-looking word cloud, which can be found in Figure 10. We  
862 further classify keywords into 7 following categories:

863 **Main Body Keywords** • SELECT • FROM • WHERE • AND • OR • NOT • IN • EXISTS • IS •  
864 NULL • IIF • CASE • CASE WHEN.

865 **Join Keywords** • INNER JOIN • LEFT JOIN • ON • AS.

866 **Clause Keywords** • BETWEEN • LIKE • LIMIT • ORDER BY • ASC • DESC • GROUP BY •  
867 HAVING • UNION • ALL • EXCEPT • PARTITION BY.

868 **Aggregation Keywords** • AVG • COUNT • MAX • MIN • ROUND • SUM.

869 **Scalar Keywords** • ABS • LENGTH • STRFTIME • JULIADAY • NOW • CAST • SUBSTR • INSTR.

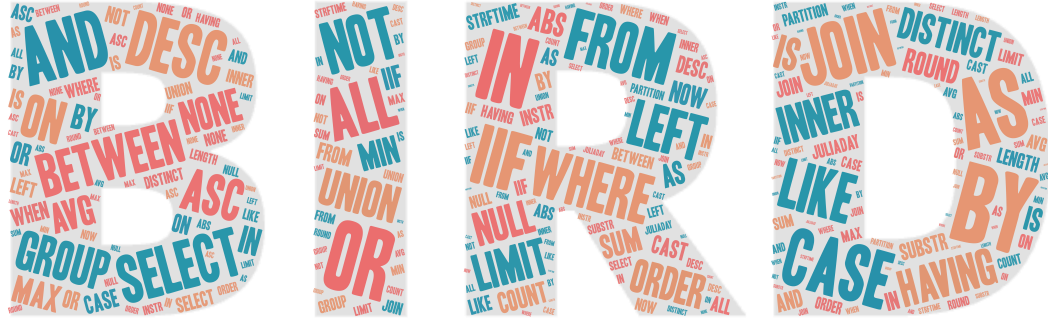

Figure 10: Keyword cloud presentation for SQLs in BIRD.

870 **Comparison Keywords** • = • > • < • > = • < = • ! =.

871 **Computing Keywords** • - • + • \* • / .

## 872 B.11 Study about Text-to-SQL Models

873 The fundamental principle of a cross-domain text-to-SQL parser involves the construction of an  
 874 encoder to learn representations of questions and schemas, followed by a decoder to generate SQLs  
 875 [35]. For example, IRNET [11] designs an encoder consisting of attention-based Bi-LSTM for  
 876 learning question and schema representations, and a decoder to predict SQLs based on the encoded  
 877 intermediate representations. RATSQ [41], SDSQ [16], LGESQ [3], and S<sup>2</sup>SQL [17], Proton  
 878 [42] enhance the representation learning of natural language questions and database schema via  
 879 relational graph neural network. R<sup>2</sup>SQL [15], SCORE [53], and STAR [2] enhance contextual  
 880 learning for conversational text-to-SQL tasks. Later, sequence-to-sequence pre-trained language  
 881 models (PLMs) such as T5 [36] become popular in text-to-SQL tasks due to their portability and  
 882 capability of generation across different datasets. These models achieve impressive results by fine-  
 883 tuning with minimal effort. Furthermore, RASAT [34] enhances T5’s structural information encoding  
 884 via schema alignment into the encoder, while Graphix [26] equips T5 with multi-hop reasoning to  
 885 achieve state-of-the-art results on complicated cross-domain text-to-SQL tasks. In recent years, LLMs  
 886 such as ChatGPT [31], Palm [7], OPT [55], have attracted considerable attention due to their powerful  
 887 zero-shot reasoning and domain generalization capabilities. ChatGPT can perform exceptionally well  
 888 on semantic parsing tasks, including text-to-SQL tasks, with minimal input data. In fact, in the BIRD  
 889 project, ChatGPT even performs more impressively than initially expected.

890 **Study about SQL Efficiency** Efficient execution of SQL queries on big databases has been a  
 891 significant topic in both academia and industries. Many techniques are proposed to improve SQL  
 892 query efficiency, by index selection [21], SQL optimization [25, 60], etc. SQL optimization is a  
 893 common method for enhancing the efficiency of SQL queries. Several SQL optimization algorithms  
 894 [27, 29, 45], such as rule-based optimization and cost-based optimization, are proven effective.  
 895 Rule-based optimization employs a set of principles to transform the SQL query into a form that can  
 896 be executed more efficiently. On the other hand, cost-based optimization estimates the execution cost  
 897 of various query plans and selects the one with the lowest cost by analyzing the statistic distribution  
 898 of database values. Similar to the NLP community, there are also recent works utilizing artificial  
 899 intelligence for query optimization such as [60]. Index prediction is another important technique for  
 900 improving SQL execution efficiency. Researchers propose many algorithms of index prediction [59]  
 901 based on various optimization criteria, such as minimizing SQL execution time, and maximizing  
 902 index utilization. In this work, we provide VES to measure the efficiency of text-to-SQL generators  
 903 to encourage them to generate accurate and fast SQLs for users.

## 904 **B.12 Limitation and Future work**

905 Despite the high quality of SQL annotation produced by double-blind annotation, the procedure  
906 is resource-intensive. Future research could explore a human-computer interaction (HCI) based  
907 approach, incorporating advanced AI systems such as GPT-4 for taking parts of annotation duties, to  
908 maintain data quality while reducing human effort. In addition, SQLite was chosen as the primary  
909 SQL codebase for previous text-to-SQL benchmarks and this study since it's friendly to users. While  
910 it presents difficulties in fetching Query Execution Plans (QEP) for precise efficiency computation  
911 and adapting to different SQL syntaxes. Future work will include PostgreSQL and MySQL versions  
912 of BIRD to resolve these limitations and provide a more robust research environment for both NLP  
913 and DB experts.
